# Supplementary material for: Seizure protein 6 and its homolog seizure 6-like protein are physiological substrates of BACE1 in neurons
Source: Springer Nature journal article supplement (doi:10.1186/s13024-016-0134-z), 2016-10-05
Supplement: MOESM3 [file 10815892]

## Supplementary Information

# Seizure protein 6 and its homolog seizure 6-like protein are physiological substrates of BACE1 in neurons

Martina Piloni<sup>1,2</sup>, Johanna Wanngren<sup>1,2</sup>, Peer-Hendrik Kuhn<sup>2,3,4</sup>, Kathryn M. Munro<sup>5</sup>, Jenny M. Gunnensen<sup>5,6</sup>, Hiroshi Takeshima<sup>7</sup>, Regina Feederle<sup>8</sup>, Iryna Voytyuk<sup>9</sup>, Bart De Strooper<sup>9,10,11</sup>, Mikail D. Levasseur<sup>12</sup>, Brian J. Hrupka<sup>12</sup>, Stephan A. Müller<sup>1,2</sup> and Stefan F. Lichtenthaler<sup>1,2,3,13\*</sup>

### Affiliations

- 1: Deutsches Zentrum für Neurodegenerative Erkrankungen (DZNE), Munich, Germany
- 2: Neuroproteomics, Klinikum rechts der Isar, Technische Universität München, Munich, Germany;
- 3: Institute for Advanced Study, Technische Universität München, Munich, Germany;
- 4: Institut für Pathologie und Pathologische Anatomie, Technische Universität München, Munich, Germany
- 5: Department of Anatomy and Neuroscience, University of Melbourne, Victoria, Australia
- 6: The Florey Institute of Neuroscience and Mental Health, University of Melbourne, Victoria, Australia
- 7: Division of Pharmaceutical Sciences, Graduate School and Faculty of Pharmaceutical Sciences, Kyoto University, Japan
- 8: German Research Center for Environmental Health, Institute of Molecular Tumor Immunology, Helmholtz Zentrum München, Munich, Germany.
- 9: VIB Center for the Biology of Disease, Leuven, Belgium
- 10: Center for Human Genetics, and Leuven Institute for Neurodegenerative Diseases (LIND), University of Leuven (KU Leuven), Leuven, Belgium
- 11: Institute of Neurology, University College London, London, UK
- 12: Department of Neuroscience, Janssen Pharmaceutica NV, Beerse, Belgium
- 13: Munich Cluster for Systems Neurology (SyNergy), Munich, Germany

\*Correspondence should be sent to: stefan.lichtenthaler@dzne.de

# Index

|                                                                                    |       |
|------------------------------------------------------------------------------------|-------|
| Suppl. Tab. 1: Identified transmembrane type 1 proteins in BACE DKO and WT CSF     | 3-10  |
| Suppl. Tab. 2: Identified transmembrane type 2 proteins in BACE DKO and WT CSF     | 3-10  |
| Suppl. Tab. 3: Identified transmembrane type 3 proteins in BACE DKO and WT CSF     | 11    |
| Suppl. Tab. 4: Identified transmembrane type 4 proteins in BACE DKO and WT CSF     | 11    |
| Suppl. Tab. 5: Identified multi-pass transmembrane proteins in BACE DKO and WT CSF | 12-13 |
| Suppl. Tab. 6: Identified GPI-anchored proteins in BACE DKO and WT CSF             | 14-15 |

Color code for schematic sequence in in the column Topology (derived by QARIP <http://webclu.bio.wzw.tum.de/qarip/>):

Signalpeptide

Extracellular domain

Transmembrane domain

Cytoplasmic domain

Lumenaldomain

Propeptide

Unknown

detected peptides

**Suppl. Tab. 2: Identified transmembrane type 1 proteins in BACE DKO and WT CSF.** (UniProt subcellular location: Single-pass type I membrane protein [SL-9905])

| UniProt AC | Protein names                                           | Gene names | Unique peptides | Ratio (DKO/WT) | p-value  | Topology (UniProt)                                                                    |
|------------|---------------------------------------------------------|------------|-----------------|----------------|----------|---------------------------------------------------------------------------------------|
| Q7TSK2     | Seizure protein 6                                       | Sez6       | 13              | 0.13           | 5.99E-06 |    |
| Q6P1D5     | Seizure 6-like protein                                  | Sez6l      | 6               | 0.21           | 5.10E-05 |  |
| Q7M729     | Sodium channel subunit beta-4                           | Scn4b      | 3               | 0.33           | 1.29E-03 |  |
| Q03157     | Amyloid-like protein 1;C30                              | Aplp1      | 28              | 0.35           | 1.51E-03 |  |
| O54901     | OX-2 membrane glycoprotein                              | Cd200      | 4               | 0.36           | NaN      |  |
| Q61809     | Leucine-rich repeat neuronal protein 1                  | Lrrn1      | 7               | 0.37           | 1.58E-03 |  |
| Q8BHC0     | Lymphatic vessel endothelial hyaluronic acid receptor 1 | Lyve1      | 3               | 0.43           | NaN      |  |
| Q9Z0Z4     | Hephaestin                                              | Heph       | 4               | 0.47           | 8.51E-04 |  |
| Q06335     | Amyloid-like protein 2                                  | Aplp2      | 17              | 0.54           | 1.83E-02 |  |
| O35988     | Syndecan-4                                              | Sdc4       | 2               | 0.63           | NaN      |  |
| P16092     | Fibroblast growth factor receptor 1                     | Fgfr1      | 7               | 0.63           | 6.81E-02 |  |
| Q6PDJ1     | VWFA and cache domain-containing protein 1              | Cachd1     | 12              | 0.66           | 2.16E-02 |  |

| UniProt AC | Protein names                                                  | Gene names | Unique peptides | Ratio (DKO/WT) | p-value  | Topology (UniProt) |
|------------|----------------------------------------------------------------|------------|-----------------|----------------|----------|--------------------|
| B0F2B4     | Neuroigin 4-like                                               | Nlgn4l     | 9               | 0.68           | 1.96E-02 |                    |
| Q61790     | Lymphocyte activation gene 3 protein                           | Lag3       | 9               | 0.72           | 7.88E-02 |                    |
| Q9DC11     | Plexin domain-containing protein 2                             | Plxdc2     | 8               | 0.74           | 1.94E-01 |                    |
| E9Q7X6     | Protein HEG homolog 1                                          | Heg1       | 11              | 0.74           | 3.38E-01 |                    |
| Q61830     | Macrophage mannose receptor 1                                  | Mrc1       | 5               | 0.75           | 2.74E-02 |                    |
| Q8BI84     | Melanoma inhibitory activity protein 3                         | Mia3       | 2               | 0.75           | 4.36E-01 |                    |
| Q61490     | CD166 antigen                                                  | Alcam      | 3               | 0.77           | 6.21E-03 |                    |
| P42703     | Leukemia inhibitory factor receptor                            | Lifr       | 18              | 0.78           | 3.88E-01 |                    |
| P11627     | Neural cell adhesion molecule L1                               | L1cam      | 14              | 0.79           | 2.85E-01 |                    |
| Q61851     | Fibroblast growth factor receptor 3                            | Fgfr3      | 6               | 0.81           | 1.73E-01 |                    |
| P70232     | Neural neural cell adhesion molecule L1-like protein           | Chl1       | 33              | 0.81           | 2.96E-01 |                    |
| Q64449     | C-type mannose receptor 2                                      | Mrc2       | 14              | 0.81           | 9.18E-02 |                    |
| Q9D7I0     | Protein shisa-5                                                | Shisa5     | 2               | 0.84           | NaN      |                    |
| Q4V9Z5     | Seizure 6-like protein 2                                       | Sez6l2     | 14              | 0.85           | 5.03E-01 |                    |
| Q9R1V6     | Disintegrin and metalloproteinase domain-containing protein 22 | Adam22     | 6               | 0.87           | 4.84E-01 |                    |
| Q99N28     | Cell adhesion molecule 3                                       | Cadm3      | 8               | 0.88           | 5.42E-01 |                    |
| O08644     | Ephrin type-B receptor 6                                       | Ephb6      | 8               | 0.88           | 3.80E-01 |                    |
| P09803     | Cadherin-1;E-Cad/CTF1;E-Cad/CTF2;E-Cad/CTF3                    | Cdh1       | 3               | 0.89           | 5.27E-01 |                    |
| P12023     | Amyloid beta A4 protein                                        | App        | 31              | 0.89           | 6.54E-01 |                    |
| Q6AZB0     | Brother of CDO                                                 | Boc        | 1               | 0.90           | 3.36E-01 |                    |
| Q9ET66     | Peptidase inhibitor 16                                         | Pi16       | 5               | 0.92           | 4.66E-01 |                    |
| P09470     | Angiotensin-converting enzyme                                  | Ace        | 32              | 0.92           | 6.36E-01 |                    |
| O88307     | Sortilin-related receptor                                      | Sorl1      | 2               | 0.93           | 7.13E-01 |                    |
| Q810U3     | Neurofascin                                                    | Nfasc      | 16              | 0.94           | 6.89E-01 |                    |
| O35393     | Ephrin-B3                                                      | Efnb3      | 10              | 0.96           | 8.53E-01 |                    |
| Q09163     | Protein delta homolog 1;Fetal antigen 1                        | Dlk1       | 2               | 0.96           | NaN      |                    |
| O35516     | Neurogenic locus notch homolog protein 2                       | Notch2     | 2               | 0.96           | NaN      |                    |
| Q91V98     | Endosialin                                                     | Cd248      | 3               | 0.97           | 6.71E-01 |                    |
| Q7TMJ8     | Phosphoinositide-3-kinase-interacting protein 1                | Pik3ip1    | 7               | 0.97           | 8.91E-01 |                    |
| Q9JKF6     | Nectin-1                                                       | Pvrl1      | 3               | 0.97           | NaN      |                    |
| Q03137     | Ephrin type-A receptor 4                                       | Epha4      | 14              | 0.98           | 9.20E-01 |                    |
| Q8VHY0     | Chondroitin sulfate proteoglycan 4                             | Cspg4      | 4               | 0.98           | 8.29E-01 |                    |
| Q6PHS9     | Voltage-dependent calcium channel subunit alpha-2/delta-2      | Cacna2d2   | 12              | 0.98           | 9.29E-01 |                    |

| UniProt AC        | Protein names                                                                                   | Gene names        | Unique peptides | Ratio (DKO/WT) | p-value  | Topology (UniProt)                                                                    |
|-------------------|-------------------------------------------------------------------------------------------------|-------------------|-----------------|----------------|----------|---------------------------------------------------------------------------------------|
| Q8VI51            | VPS10 domain-containing receptor SorCS3                                                         | Sorcs3            | 7               | 0.99           | 9.40E-01 |    |
| Q62313;<br>Q62314 | Trans-Golgi network integral membrane protein 1;Trans-Golgi network integral membrane protein 2 | Tgoln1;<br>Tgoln2 | 2               | 0.99           | NaN      |    |
| P17047            | Lysosome-associated membrane glycoprotein 2                                                     | Lamp2             | 3               | 1.00           | NaN      |    |
| P09581            | Macrophage colony-stimulating factor 1 receptor                                                 | Csf1r             | 9               | 1.01           | 9.73E-01 |    |
| P80560            | Receptor-type tyrosine-protein phosphatase N2                                                   | Ptprn2            | 17              | 1.01           | 9.77E-01 |    |
| Q01279            | Epidermal growth factor receptor                                                                | Egfr              | 16              | 1.01           | 9.83E-01 |    |
| Q64487            | Receptor-type tyrosine-protein phosphatase delta                                                | Ptprd             | 4               | 1.02           | 8.63E-01 |    |
| Q62179            | Semaphorin-4B                                                                                   | Sema4b            | 9               | 1.03           | 9.17E-01 |    |
| P13595            | Neural cell adhesion molecule 1                                                                 | Ncam1             | 24              | 1.03           | 8.81E-01 |    |
| Q9R1V7            | Disintegrin and metalloproteinase domain-containing protein 23                                  | Adam23            | 5               | 1.05           | 7.17E-01 |    |
| Q9EPR5            | VPS10 domain-containing receptor SorCS2                                                         | Sorcs2            | 2               | 1.05           | 8.47E-01 |    |
| Q922P8            | Transmembrane protein 132A                                                                      | Tmem132a          | 23              | 1.05           | 8.72E-01 |    |
| P18572            | Basigin                                                                                         | Bsg               | 2               | 1.05           | NaN      |    |
| Q9CPW0            | Contactin-associated protein-like 2                                                             | Cntnap2           | 6               | 1.06           | 6.82E-01 |    |
| O35188            | Fractalkine;Processed fractalkine                                                               | Cx3cl1            | 3               | 1.07           | 6.70E-01 |    |
| Q8BX43            | Tumor necrosis factor receptor superfamily member 19L                                           | Relt              | 2               | 1.08           | 7.57E-01 |    |
| Q8CJH3            | Plexin-B1                                                                                       | Plxnb1            | 3               | 1.08           | 5.24E-01 |    |
| P55288            | Cadherin-11                                                                                     | Cdh11             | 8               | 1.09           | 5.01E-01 |    |
| P15116            | Cadherin-2                                                                                      | Cdh2              | 15              | 1.09           | 7.26E-01 |    |
| Q9ER65            | Calsyntenin-2                                                                                   | Clstn2            | 3               | 1.09           | NaN      |  |
| Q91ZX7            | Pro-low-density lipoprotein receptor-related protein 1                                          | Lrp1              | 41              | 1.09           | 5.67E-01 |  |
| P11438            | Lysosome-associated membrane glycoprotein 1                                                     | Lamp1             | 5               | 1.09           | 5.73E-01 |  |
| P98156            | Very low-density lipoprotein receptor                                                           | Vldlr             | 3               | 1.10           | 6.18E-01 |  |
| Q9JLC4            | VPS10 domain-containing receptor SorCS1                                                         | Sorcs1            | 12              | 1.10           | 6.35E-01 |  |
| Q8R5M8            | Cell adhesion molecule 1                                                                        | Cadm1             | 8               | 1.11           | 6.17E-01 |  |
| O35664            | Interferon alpha/beta receptor 2                                                                | Ifnar2            | 4               | 1.11           | 5.23E-01 |  |
| P29533            | Vascular cell adhesion protein 1                                                                | Vcam1             | 13              | 1.12           | 5.22E-01 |  |
| O88393            | Transforming growth factor beta receptor type 3                                                 | Tgfb3             | 10              | 1.12           | 6.08E-01 |  |
| Q9CZT5            | Vasorin                                                                                         | Vasn              | 7               | 1.13           | 5.30E-01 |  |
| Q9Z1L5            | Voltage-dependent calcium channel subunit alpha-2/delta-3                                       | Cacna2d3          | 20              | 1.13           | 5.95E-01 |  |
| P97333            | Neuropilin-1                                                                                    | Nrp1              | 6               | 1.13           | 1.09E-01 |  |
| Q99JH7            | Calsyntenin-3                                                                                   | Clstn3            | 16              | 1.14           | 5.62E-01 |  |

| UniProt AC | Protein names                                                                                     | Gene names | Unique peptides | Ratio (DKO/WT) | p-value  | Topology (UniProt)                                                                    |
|------------|---------------------------------------------------------------------------------------------------|------------|-----------------|----------------|----------|---------------------------------------------------------------------------------------|
| Q6P1B3     | PILR alpha-associated neural protein                                                              | Pianp      | 2               | 1.15           | 3.07E-01 |    |
| P15379     | CD44 antigen                                                                                      | Cd44       | 2               | 1.15           | 1.76E-02 |    |
| Q6P9K9     | Neurexin-3                                                                                        | Nrxn3      | 26              | 1.16           | 5.02E-01 |    |
| Q62165     | Dystroglycan;Alpha-dystroglycan;Beta-dystroglycan                                                 | Dag1       | 13              | 1.17           | 5.34E-01 |    |
| O89026     | Roundabout homolog 1                                                                              | Robo1      | 7               | 1.17           | 1.28E-01 |    |
| Q60673     | Receptor-type tyrosine-protein phosphatase-like N                                                 | Ptpn       | 8               | 1.18           | 5.47E-01 |    |
| P39038     | Cadherin-4                                                                                        | Cdh4       | 7               | 1.18           | 5.13E-01 |    |
| Q9EPL2     | Calsyntenin-1;Soluble Alc-alpha;CTF1-alpha                                                        | Clstn1     | 34              | 1.18           | 4.38E-01 |    |
| B2RXS4     | Plexin-B2                                                                                         | Plxbn2     | 10              | 1.18           | 3.53E-01 |    |
| Q810B7     | SLIT and NTRK-like protein 5                                                                      | Slitrk5    | 3               | 1.18           | 3.00E-01 |    |
| Q8BGX3     | Leucine-rich repeat and transmembrane domain-containing protein 2                                 | Lrtm2      | 5               | 1.18           | 2.05E-01 |    |
| Q9CYN9     | Renin receptor                                                                                    | Atp6ap2    | 11              | 1.19           | 5.91E-01 |    |
| P05532     | Mast/stem cell growth factor receptor Kit                                                         | Kit        | 4               | 1.19           | NaN      |    |
| B0V2N1     | Receptor-type tyrosine-protein phosphatase S                                                      | Ptpn       | 4               | 1.19           | 4.37E-01 |    |
| Q810C1     | SLIT and NTRK-like protein 1                                                                      | Slitrk1    | 7               | 1.19           | 4.49E-01 |    |
| Q9EPU5     | Tumor necrosis factor receptor superfamily member 21                                              | Tnfrsf21   | 9               | 1.19           | 4.38E-01 |    |
| P35951     | Low-density lipoprotein receptor                                                                  | Ldlr       | 8               | 1.20           | 2.33E-01 |    |
| O35136     | Neural cell adhesion molecule 2                                                                   | Ncam2      | 5               | 1.21           | 3.95E-01 |    |
| O08532     | Voltage-dependent calcium channel subunit alpha-2/delta-1                                         | Cacna2d1   | 33              | 1.21           | 4.12E-01 |    |
| Q7TSK3     | Protocadherin-8                                                                                   | Pcdh8      | 6               | 1.22           | 1.34E-01 |    |
| Q8BYM5     | Neuroigin-3                                                                                       | Nlgn3      | 4               | 1.23           | 1.05E-01 |    |
| Q8BH27     | Multiple epidermal growth factor-like domains protein 9                                           | Megf9      | 2               | 1.23           | 2.07E-01 |    |
| P33146     | Cadherin-15                                                                                       | Cdh15      | 7               | 1.23           | 3.78E-01 |    |
| Q6IEE6     | Transmembrane protein 132E                                                                        | Tmem132e   | 9               | 1.24           | 2.11E-01 |   |
| P07141     | Macrophage colony-stimulating factor 1                                                            | Csf1       | 6               | 1.24           | 2.59E-01 |  |
| Q9CR75     | Tumor necrosis factor receptor superfamily member 12A                                             | Tnfrsf12a  | 3               | 1.24           | 1.13E-01 |  |
| P35822     | Receptor-type tyrosine-protein phosphatase kappa                                                  | Ptpn       | 5               | 1.25           | 2.96E-02 |  |
| P97300     | Neuroplastin                                                                                      | Nptn       | 5               | 1.25           | 1.85E-01 |  |
| Q9D1T0     | Leucine-rich repeat and immunoglobulin-like domain-containing nogo receptor-interacting protein 1 | Lingo1     | 10              | 1.25           | 3.51E-01 |  |
| Q61730     | Interleukin-1 receptor accessory protein                                                          | Il1rap     | 19              | 1.26           | 4.15E-01 |  |
| Q8CEF9     | Transmembrane protein 132C                                                                        | Tmem132c   | 4               | 1.27           | 1.01E-01 |  |
| B9EKR1     | Receptor-type tyrosine-protein phosphatase zeta                                                   | Ptpn       | 22              | 1.28           | 3.03E-01 |  |

| UniProt AC | Protein names                                                            | Gene names | Unique peptides | Ratio (DKO/WT) | p-value  | Topology (UniProt) |
|------------|--------------------------------------------------------------------------|------------|-----------------|----------------|----------|--------------------|
| Q810B8     | SLIT and NTRK-like protein 4                                             | Slitrk4    | 6               | 1.29           | 2.67E-01 |                    |
| Q05909     | Receptor-type tyrosine-protein phosphatase gamma                         | Ptprg      | 3               | 1.30           | 4.62E-02 |                    |
| Q9CS84     | Neurexin-1                                                               | Nrxn1      | 26              | 1.32           | 1.28E-01 |                    |
| Q810C0     | SLIT and NTRK-like protein 2                                             | Slitrk2    | 2               | 1.32           | NaN      |                    |
| Q76KF0     | Semaphorin-6D                                                            | Sema6d     | 13              | 1.34           | 2.13E-01 |                    |
| Q9JME9     | V-set and transmembrane domain-containing protein 2B                     | Vstm2b     | 4               | 1.36           | 7.11E-02 |                    |
| Q6DIB5     | Multiple epidermal growth factor-like domains protein 10                 | Megf10     | 14              | 1.39           | 5.68E-02 |                    |
| P52800     | Ephrin-B2                                                                | Efnb2      | 2               | 1.40           | 3.32E-02 |                    |
| P97291     | Cadherin-8                                                               | Cdh8       | 6               | 1.40           | 7.09E-03 |                    |
| Q8JZM4     | Delta and Notch-like epidermal growth factor-related receptor            | Dner       | 6               | 1.40           | 8.97E-02 |                    |
| Q8BT18     | Uncharacterized protein C14orf37 homolog                                 |            | 3               | 1.42           | 1.09E-01 |                    |
| Q9R1V4     | Disintegrin and metalloproteinase domain-containing protein 11           | Adam11     | 3               | 1.45           | NaN      |                    |
| Q810U4     | Neuronal cell adhesion molecule                                          | Nrcam      | 22              | 1.46           | 1.52E-01 |                    |
| Q99K10     | Neuroigin-1                                                              | Nlgn1      | 2               | 1.47           | 7.25E-02 |                    |
| O35930     | Platelet glycoprotein Ib alpha chain                                     | Gp1ba      | 7               | 1.47           | NaN      |                    |
| Q99P47     | Contactin-associated protein-like 4                                      | Cntnap4    | 22              | 1.50           | 1.95E-01 |                    |
| Q80TG9     | Leucine-rich repeat and fibronectin type-III domain-containing protein 2 | Lfn2       | 3               | 1.54           | NaN      |                    |
| P97798     | Neogenin                                                                 | Neo1       | 6               | 1.57           | 1.45E-02 |                    |
| O54951     | Semaphorin-6B                                                            | Sema6b     | 5               | 1.59           | 9.75E-02 |                    |
| P35546     | Proto-oncogene tyrosine-protein kinase receptor Ret                      | Ret        | 3               | 1.64           | NaN      |                    |
| P01898     | H-2 class I histocompatibility antigen, Q10 alpha chain                  | H2-Q10     | 7               | 1.74           | 1.80E-01 |                    |
| Q810B9     | SLIT and NTRK-like protein 3                                             | Slitrk3    | 4               | 1.88           | 5.96E-03 |                    |
| Q8R464     | Cell adhesion molecule 4                                                 | Cadm4      | 4               | 1.93           | 3.82E-03 |                    |
| Q9DBH5     | Vesicular integral-membrane protein VIP36                                | Lman2      | 3               | 2.88           | NaN      |                    |
| Q00560     | Interleukin-6 receptor subunit beta                                      | Il6st      | 4               | NaN            | NaN      |                    |
| P10404     | MLV-related proviral Env polyprotein                                     |            | 6               | NaN            | NaN      |                    |
| Q99NH8     | Triggering receptor expressed on myeloid cells 2                         | Trem2      | 2               | NaN            | NaN      |                    |
| Q9JHJ8     | ICOS ligand                                                              | Icoslg     | 3               | NaN            | NaN      |                    |
| O89103     | Complement component C1q receptor                                        | Cd93       | 3               | NaN            | NaN      |                    |
| P09055     | Integrin beta-1                                                          | Itgb1      | 3               | NaN            | NaN      |                    |
| O35464     | Semaphorin-6A                                                            | Sema6a     | 2               | NaN            | NaN      |                    |
| O35598     | Disintegrin and metalloproteinase domain-containing protein 10           | Adam10     | 1               | NaN            | NaN      |                    |
| O88324     | CD83 antigen                                                             | Cd83       | 1               | NaN            | NaN      |                    |

| UniProt AC | Protein names                                                         | Gene names | Unique peptides | Ratio (DKO/WT) | p-value | Topology (UniProt)                                                                    |
|------------|-----------------------------------------------------------------------|------------|-----------------|----------------|---------|---------------------------------------------------------------------------------------|
| P14430     | H-2 class I histocompatibility antigen, Q8 alpha chain                | H2-Q8      | 1               | NaN            | NaN     |    |
| P15209     | BDNF/NT-3 growth factors receptor                                     | Ntrk2      | 1               | NaN            | NaN     |    |
| P20917     | Myelin-associated glycoprotein                                        | Mag        | 2               | NaN            | NaN     |    |
| P25118     | Tumor necrosis factor receptor superfamily member 1A                  | Tnfrsf1a   | 1               | NaN            | NaN     |    |
| P26618     | Platelet-derived growth factor receptor alpha                         | Pdgfra     | 2               | NaN            | NaN     |    |
| P28825     | Meprin A subunit alpha                                                | Mep1a      | 1               | NaN            | NaN     |    |
| P28828     | Receptor-type tyrosine-protein phosphatase mu                         | Ptprm      | 1               | NaN            | NaN     |    |
| P55284     | Cadherin-5                                                            | Cdh5       | 8               | NaN            | NaN     |    |
| P70408     | Cadherin-10                                                           | Cdh10      | 3               | NaN            | NaN     |    |
| P97326     | Cadherin-6                                                            | Cdh6       | 3               | NaN            | NaN     |    |
| P97797     | Tyrosine-protein phosphatase non-receptor type substrate 1            | Sirpa      | 1               | NaN            | NaN     |    |
| P97952     | Sodium channel subunit beta-1                                         | Scn1b      | 1               | NaN            | NaN     |    |
| Q03146     | Epithelial discoidin domain-containing receptor 1                     | Ddr1       | 2               | NaN            | NaN     |    |
| Q06186     | Proheparin-binding EGF-like growth factor                             | Hbegf      | 1               | NaN            | NaN     |    |
| Q3UH99     | Protein shisa-6 homolog                                               | Shisa6     | 1               | NaN            | NaN     |    |
| Q5SZV5     | Dyslexia-associated protein KIAA0319 homolog                          | Kiaa0319   | 1               | NaN            | NaN     |    |
| Q60805     | Tyrosine-protein kinase Mer                                           | Mertk      | 1               | NaN            | NaN     |    |
| Q61772     | Ephrin type-A receptor 7                                              | Epha7      | 4               | NaN            | NaN     |    |
| Q64314     | Hematopoietic progenitor cell antigen CD34                            | Cd34       | 2               | NaN            | NaN     |    |
| Q69ZN6     | N-acetylglucosamine-1-phosphotransferase subunits alpha/beta          | Gnptab     | 1               | NaN            | NaN     |    |
| Q6PHU5     | Sortilin                                                              | Sort1      | 2               | NaN            | NaN     |    |
| Q71M36     | Chondroitin sulfate proteoglycan 5                                    | Cspg5      | 2               | NaN            | NaN     |    |
| Q8BIF0     | CD99 antigen-like protein 2                                           | Cd99l2     | 1               | NaN            | NaN     |    |
| Q8BLQ9     | Cell adhesion molecule 2                                              | Cadm2      | 4               | NaN            | NaN     |   |
| Q8BSU2     | C-X-C motif chemokine 16                                              | Cxcl16     | 1               | NaN            | NaN     |  |
| Q8C985     | Neurexin-3-beta;Neurexin-3-beta                                       | Nrxn3      | 1               | NaN            | NaN     |  |
| Q8CAE9     | Podocalyxin-like protein 2                                            | Podxl2     | 1               | NaN            | NaN     |  |
| Q8CB67     | Low-density lipoprotein receptor-related protein 11                   | Lrp11      | 2               | NaN            | NaN     |  |
| Q8R2Y2     | Cell surface glycoprotein MUC18                                       | Mcam       | 1               | NaN            | NaN     |  |
| Q9D0F3     | Protein ERGIC-53                                                      | Lman1      | 3               | NaN            | NaN     |  |
| Q9QZ26     | Potassium voltage-gated channel subfamily E regulatory beta subunit 5 | Kcne5      | 1               | NaN            | NaN     |  |
| Q9WU03     | Kunitz-type protease inhibitor 2                                      | Spint2     | 1               | NaN            | NaN     |  |



**Suppl. Tab. 2: Identified transmembrane type 2 proteins in BACE DKO and WT CSF (UniProt subcellular location: Single-pass type II membrane protein [SL-9906])**

| UniProt AC | Protein names                                                                                                         | Gene names | Unique peptides | Ratio (DKO/WT) | p-value  | Topology (UniProt) |
|------------|-----------------------------------------------------------------------------------------------------------------------|------------|-----------------|----------------|----------|--------------------|
| F6VAN0     | Cyclic AMP-dependent transcription factor ATF-6 alpha;Processed cyclic AMP-dependent transcription factor ATF-6 alpha | Atf6       | 2               | 0.51           | 1.38E-01 |                    |
| P14094     | Sodium/potassium-transporting ATPase subunit beta-1                                                                   | Atp1b1     | 1               | 0.57           | NaN      |                    |
| Q6P1J0     | Glycoprotein endo-alpha-1,2-mannosidase-like protein                                                                  | Maneal     | 3               | 0.68           | NaN      |                    |
| P97370     | Sodium/potassium-transporting ATPase subunit beta-3                                                                   | Atp1b3     | 3               | 0.70           | 5.09E-01 |                    |
| P10852     | 4F2 cell-surface antigen heavy chain                                                                                  | Slc3a2     | 5               | 0.86           | 4.74E-02 |                    |
| Q3U4G3     | Xyloside xylosyltransferase 1                                                                                         | Xxylt1     | 11              | 0.92           | 5.84E-01 |                    |
| Q8BQ86     | Carbohydrate sulfotransferase 8                                                                                       | Chst8      | 2               | 0.93           | 6.63E-01 |                    |
| Q922Q6     | Alpha/beta hydrolase domain-containing protein 14A                                                                    | Abhd14a    | 3               | 0.97           | 7.06E-01 |                    |
| Q10470     | Beta-1,4-mannosyl-glycoprotein 4-beta-N-acetylglucosaminyltransferase                                                 | Mgat3      | 2               | 1.00           | NaN      |                    |
| Q91XQ5     | Carbohydrate sulfotransferase 15                                                                                      | Chst15     | 7               | 1.00           | 9.82E-01 |                    |
| Q8CF93     | Polypeptide N-acetylgalactosaminyltransferase 13                                                                      | Galnt13    | 3               | 1.01           | 9.45E-01 |                    |
| O89051     | Integral membrane protein 2B;BRI2, membrane form;BRI2 intracellular domain;BRI2C, soluble form;Bri23 peptide          | Itm2b      | 8               | 1.01           | 9.60E-01 |                    |
| Q921V5     | Alpha-1,6-mannosyl-glycoprotein 2-beta-N-acetylglucosaminyltransferase                                                | Mgat2      | 6               | 1.03           | 8.65E-01 |                    |
| P15535     | Beta-1,4-galactosyltransferase 1;Lactose synthase A protein                                                           | B4galt1    | 5               | 1.03           | 8.14E-01 |                    |
| Q8BWP8     | Beta-1,4-glucuronyltransferase 1                                                                                      | B3gnt1     | 12              | 1.06           | 8.23E-01 |                    |
| A2ASQ1     | Agrin                                                                                                                 | Agrn       | 9               | 1.08           | 7.35E-01 |                    |
| Q8VCF1     | Soluble calcium-activated nucleotidase 1                                                                              | Cant1      | 13              | 1.08           | 6.41E-01 |                    |
| O09010     | Beta-1,3-N-acetylglucosaminyltransferase lunatic fringe                                                               | Lfng       | 16              | 1.08           | 7.43E-01 |                    |
| Q811B1     | Xylosyltransferase 1                                                                                                  | Xylt1      | 3               | 1.09           | 5.43E-01 |                    |
| O35405     | Phospholipase D3                                                                                                      | Pld3       | 6               | 1.10           | 6.40E-01 |                    |
| P45700     | Mannosyl-oligosaccharide 1,2-alpha-mannosidase IA                                                                     | Man1a1     | 19              | 1.11           | 6.33E-01 |                    |
| Q9EQH2     | Endoplasmic reticulum aminopeptidase 1                                                                                | Erap1      | 6               | 1.14           | 8.28E-02 |                    |
| Q80V26     | Inositol monophosphatase 3                                                                                            | Impad1     | 5               | 1.18           | 5.45E-01 |                    |
| Q99J85     | Neuronal pentraxin receptor                                                                                           | Nptxr      | 17              | 1.19           | 3.98E-01 |                    |
| Q9JJ61     | Polypeptide N-acetylgalactosaminyltransferase 16                                                                      | Galnt11    | 3               | 1.21           | 3.02E-01 |                    |
| Q6PB93     | Polypeptide N-acetylgalactosaminyltransferase 2                                                                       | Galnt2     | 3               | 1.21           | 2.11E-01 |                    |
| Q8R4G6     | Alpha-1,6-mannosylglycoprotein 6-beta-N-acetylglucosaminyltransferase A                                               | Mgat5      | 11              | 1.22           | 5.02E-01 |                    |
| Q8K4Q8     | Collectin-12                                                                                                          | Colec12    | 3               | 1.23           | 2.27E-01 |                    |
| O08912     | Polypeptide N-acetylgalactosaminyltransferase 1                                                                       | Galnt1     | 8               | 1.24           | 1.02E-01 |                    |
| O88587     | Catechol O-methyltransferase                                                                                          | Comt       | 4               | 1.25           | NaN      |                    |

| UniProt AC | Protein names                                                       | Gene names | Unique peptides | Ratio (DKO/WT) | p-value  | Topology (UniProt)                                                                  |
|------------|---------------------------------------------------------------------|------------|-----------------|----------------|----------|-------------------------------------------------------------------------------------|
| Q09200     | Beta-1,4 N-acetylgalactosaminyltransferase 1                        | B4galnt1   | 3               | 1.26           | NaN      |  |
| Q62351     | Transferrin receptor protein 1                                      | Tfrc       | 14              | 1.27           | 7.12E-02 |  |
| Q91X88     | Protein O-linked-mannose beta-1,2-N-acetylglucosaminyltransferase 1 | Pomgnt1    | 8               | 1.30           | 8.66E-02 |  |
| Q3UHN9     | Bifunctional heparan sulfate N-deacetylase/N-sulfotransferase 1     | Ndst1      | 7               | 1.30           | 2.35E-01 |  |
| P70428     | Exostosin-2                                                         | Ext2       | 5               | 1.43           | 5.96E-02 |  |
| P70126     | Alpha-2,8-sialyltransferase 8E                                      | St8sia5    | 4               | 1.46           | 5.94E-02 |  |
| Q8BXA1     | Golgi integral membrane protein 4                                   | Golim4     | 2               | 1.46           | 3.54E-02 |  |
| Q9ES89     | Exostosin-like 2                                                    | Extl2      | 9               | 1.55           | 8.23E-02 |  |
| Q8BRK9     | Alpha-mannosidase 2x                                                | Man2a2     | 17              | 1.62           | 3.66E-02 |  |
| Q8VIB3     | Type 2 lactosamine alpha-2,3-sialyltransferase                      | St3gal6    | 2               | NaN            | NaN      |  |
| Q62092     | Neuron-specific protein family member 1                             | Nsg1       | 1               | NaN            | NaN      |  |
| Q91VK4     | Integral membrane protein 2C;CT-BRI3                                | Itm2c      | 1               | NaN            | NaN      |  |
| P39098     | Mannosyl-oligosaccharide 1,2-alpha-mannosidase IB                   | Man1a2     | 1               | NaN            | NaN      |  |
| P27046     | Alpha-mannosidase 2                                                 | Man2a1     | 5               | NaN            | NaN      |  |
| Q91XA2     | Golgi membrane protein 1                                            | Golm1      | 2               | NaN            | NaN      |  |
| Q69ZN6     | N-acetylglucosamine-1-phosphotransferase subunits alpha/beta        | Gnptab     | 1               | NaN            | NaN      |  |
| Q8K1B9     | Polypeptide N-acetylgalactosaminyltransferase 18                    | Galntl4    | 2               | NaN            | NaN      |  |
| P97402     | N-acetyllactosaminide beta-1,6-N-acetylglucosaminyl-transferase     | Gcnt2      | 1               | NaN            | NaN      |  |
| Q6P2L7     | Protein CASC4                                                       | Casc4      | 3               | NaN            | NaN      |  |
| Q9Z222     | N-acetyllactosaminide beta-1,3-N-acetylglucosaminyltransferase 2    | B3gnt2     | 1               | NaN            | NaN      |  |

**Suppl. Tab. 3: Identified transmembrane type 3 proteins in BACE DKO and WT CSF (UniProt subcellular location: Single-pass type III membrane protein [SL-9907])**

| UniProt AC | Protein names                                      | Gene names | Unique peptides | Ratio (DKO/WT) | p-value  | Topology (UniProt)                                                                  |
|------------|----------------------------------------------------|------------|-----------------|----------------|----------|-------------------------------------------------------------------------------------|
| P41216     | Long-chain-fatty-acid--CoA ligase 1                | Acs1       | 7               | 0.83           | 7.51E-01 |  |
| Q04646     | Sodium/potassium-transporting ATPase subunit gamma | Fxyd2      | 2               | 0.93           | 7.46E-01 |  |

**Suppl. Tab. 4: Identified transmembrane type 4 proteins in BACE DKO and WT CSF (UniProt subcellular location: Single-pass type I membrane protein [SL-9908])**

| UniProt AC | Protein names                                            | Gene names | Unique peptides | Ratio (DKO/WT) | p-value | Topology (UniProt)                                                                  |
|------------|----------------------------------------------------------|------------|-----------------|----------------|---------|-------------------------------------------------------------------------------------|
| Q9QY76     | Vesicle-associated membrane protein-associated protein B | Vapb       | 2               | NaN            | NaN     |  |

**Suppl. Tab. 5: Identified multi-pass transmembrane proteins in BACE DKO and WT CSF (UniProt subcellular location: Multi-pass membrane protein [SL-9909])**

| UniProt AC | Protein names                                                            | Gene names | Unique peptides | Ratio (DKO/WT) | p-value  | Topology (UniProt) |
|------------|--------------------------------------------------------------------------|------------|-----------------|----------------|----------|--------------------|
| Q60932     | Voltage-dependent anion-selective channel protein 1                      | Vdac1      | 14              | 0.49           | 1.30E-01 |                    |
| Q64518     | Sarcoplasmic/endoplasmic reticulum calcium ATPase 3                      | Atp2a3     | 2               | 0.49           | 1.39E-01 |                    |
| Q8R429     | Sarcoplasmic/endoplasmic reticulum calcium ATPase 1                      | Atp2a1     | 37              | 0.49           | 9.49E-02 |                    |
| P48962     | ADP/ATP translocase 1                                                    | Slc25a4    | 15              | 0.57           | 1.72E-01 |                    |
| Q6PIE5     | Sodium/potassium-transporting ATPase subunit alpha-2                     | Atp1a2     | 18              | 0.59           | 3.03E-01 |                    |
| Q8BH59     | Calcium-binding mitochondrial carrier protein Aralar1                    | Slc25a12   | 7               | 0.61           | NaN      |                    |
| Q8K182     | Complement component C8 alpha chain                                      | C8a        | 30              | 0.65           | 5.93E-01 |                    |
| Q9DBG6     | Dolichyl-diphosphooligosaccharide--protein glycosyltransferase subunit 2 | Rpn2       | 2               | 0.66           | NaN      |                    |
| Q8VEM8     | Phosphate carrier protein, mitochondrial                                 | Slc25a3    | 8               | 0.70           | 4.69E-01 |                    |
| Q99P72     | Reticulon-4                                                              | Rtn4       | 2               | 0.79           | 5.37E-01 |                    |
| P00405     | Cytochrome c oxidase subunit 2                                           | Mtco2      | 2               | 0.85           | 6.57E-01 |                    |
| Q8C145     | Zinc transporter ZIP6                                                    | Slc39a6    | 3               | 0.87           | 3.07E-01 |                    |
| Q9QY42     | Prosaposin receptor GPR37                                                | Gpr37      | 6               | 0.93           | 6.69E-01 |                    |
| Q6PE13     | Proline-rich transmembrane protein 3                                     | Prrt3      | 4               | 0.96           | 7.76E-01 |                    |
| Q6P5F6     | Zinc transporter ZIP10                                                   | Slc39a10   | 4               | 0.96           | 8.14E-01 |                    |
| Q80TS3     | Latrophilin-3                                                            | Lphn3      | 5               | 1.00           | NaN      |                    |
| Q9R0M0     | Cadherin EGF LAG seven-pass G-type receptor 2                            | Celsr2     | 8               | 1.01           | 9.80E-01 |                    |
| P06683     | Complement component C9                                                  | C9         | 24              | 1.04           | 9.33E-01 |                    |
| O70622     | Reticulon-2                                                              | Rtn2       | 3               | 1.07           | NaN      |                    |
| Q61735     | Leukocyte surface antigen CD47                                           | Cd47       | 2               | 1.08           | NaN      |                    |
| Q8VDN2     | Sodium/potassium-transporting ATPase subunit alpha-1                     | Atp1a1     | 7               | 1.09           | NaN      |                    |
| Q8K135     | Dyslexia-associated protein KIAA0319-like protein                        | Kiaa0319l  | 4               | 1.10           | 6.67E-01 |                    |
| Q99JG2     | Prosaposin receptor GPR37L1                                              | Gpr37l1    | 4               | 1.11           | 4.40E-01 |                    |
| Q9Z0M6     | CD97 antigen                                                             | Cd97       | 4               | 1.13           | NaN      |                    |
| P35762     | CD81 antigen                                                             | Cd81       | 2               | 1.14           | 4.95E-01 |                    |
| P04919     | Band 3 anion transport protein                                           | Slc4a1     | 22              | 1.15           | 8.83E-01 |                    |
| Q80TR1     | Latrophilin-1                                                            | Lphn1      | 4               | 1.21           | 2.35E-01 |                    |
| Q9Z2W8     | Glutamate receptor 4                                                     | Gria4      | 9               | 1.29           | 2.70E-01 |                    |
| Q3UHD1     | Brain-specific angiogenesis inhibitor 1                                  | Bai1       | 4               | 1.34           | 1.83E-02 |                    |
| Q8CGM1     | Brain-specific angiogenesis inhibitor 2                                  | Bai2       | 7               | 1.43           | 1.32E-01 |                    |
| G5E8Q8     |                                                                          | Gpr116     | 2               | NaN            | NaN      |                    |

| UniProt AC | Protein names                                                                  | Gene names | Unique peptides | Ratio (DKO/WT) | p-value | Topology (UniProt) |
|------------|--------------------------------------------------------------------------------|------------|-----------------|----------------|---------|--------------------|
| Q8JZQ2     | AFG3-like protein 2;AFG3-like protein 1                                        | Afg3l2     | 2               | NaN            | NaN     |                    |
| Q80ZF8     | Brain-specific angiogenesis inhibitor 3                                        | Bai3       | 2               | NaN            | NaN     |                    |
| Q08857     | Platelet glycoprotein 4                                                        | Cd36       | 2               | NaN            | NaN     |                    |
| Q924X2     | Carnitine O-palmitoyltransferase 1, muscle isoform                             | Cpt1b      | 4               | NaN            | NaN     |                    |
| P56475     | Gamma-aminobutyric acid receptor subunit rho-1                                 | Gabbr1     | 1               | NaN            | NaN     |                    |
| Q91VS7     | Microsomal glutathione S-transferase 1                                         | Mgst1      | 1               | NaN            | NaN     |                    |
| Q61885     | Myelin-oligodendrocyte glycoprotein                                            | Mog        | 1               | NaN            | NaN     |                    |
| Q9D023     | Mitochondrial pyruvate carrier 2                                               | Mpc2       | 3               | NaN            | NaN     |                    |
| Q791V5     | Mitochondrial carrier homolog 2                                                | Mtch2      | 1               | NaN            | NaN     |                    |
| P03921     | NADH-ubiquinone oxidoreductase chain 5                                         | Mtnd5      | 1               | NaN            | NaN     |                    |
| E9PZQ0     | Ryanodine receptor 1                                                           | Ryr1       | 2               | NaN            | NaN     |                    |
| Q9CXV1     | Succinate dehydrogenase [ubiquinone] cytochrome b small subunit, mitochondrial | Sdhb       | 1               | NaN            | NaN     |                    |
| P53986     | Monocarboxylate transporter 1                                                  | Slc16a1    | 1               | NaN            | NaN     |                    |
| P56564     | Excitatory amino acid transporter 1                                            | Slc1a3     | 2               | NaN            | NaN     |                    |
| Q9CR62     | Mitochondrial 2-oxoglutarate/malate carrier protein                            | Slc25a11   | 3               | NaN            | NaN     |                    |
| Q5I012     | Putative sodium-coupled neutral amino acid transporter 10                      | Slc38a10   | 1               | NaN            | NaN     |                    |
| P31648     | Sodium- and chloride-dependent GABA transporter 1                              | Slc6a1     | 1               | NaN            | NaN     |                    |
| O89104     | Synaptophysin-like protein 2                                                   | Sypl2      | 3               | NaN            | NaN     |                    |
| Q3TMP8     | Trimeric intracellular cation channel type A                                   | Tmem38a    | 1               | NaN            | NaN     |                    |
| P12242     | Mitochondrial brown fat uncoupling protein 1                                   | Ucp1       | 3               | NaN            | NaN     |                    |
| Q3UDR8     | Protein YIPF3                                                                  | Yipf3      | 1               | NaN            | NaN     |                    |

**Suppl. Tab. 6: Identified GPI-anchored proteins in BACE DKO and WT CSF (UniProt subcellular location: GPI-anchor [SL-9902]).** Proteins that are annotated as transmembrane type 1 proteins as well as GPI-anchored proteins are indicated with a yellow background.

| UniProt AC    | Protein names                                                    | Gene names   | Unique peptides | Ratio (DKO/WT) | p-value         | Topology (UniProt) |
|---------------|------------------------------------------------------------------|--------------|-----------------|----------------|-----------------|--------------------|
| Q9QUR8        | Semaphorin-7A                                                    | Sema7a       | 27              | 0.81           | 3.12E-01        |                    |
| P10810        | Monocyte differentiation antigen CD14                            | Cd14         | 11              | 0.82           | 4.60E-01        |                    |
| Q8R2G4        | Ecto-ADP-ribosyltransferase 3                                    | Art3         | 5               | 0.90           | 4.92E-01        |                    |
| Q61468        | Mesothelin;Megakaryocyte-potentiating factor                     | Msln         | 5               | 0.95           | 7.49E-01        |                    |
| Q9D7F2        | Ly6/PLAUR domain-containing protein 6B                           | Lypd6b       | 3               | 0.97           | 9.06E-01        |                    |
| Q61330        | Contactin-2                                                      | Cntn2        | 29              | 0.98           | 8.92E-01        |                    |
| Q9WUC3        | Lymphocyte antigen 6H                                            | Ly6h         | 5               | 1.00           | 9.91E-01        |                    |
| Q6PCX7        | Repulsive guidance molecule A                                    | Rgma         | 11              | 1.00           | 9.83E-01        |                    |
| Q63912        | Oligodendrocyte-myelin glycoprotein                              | Omg          | 7               | 1.02           | 9.27E-01        |                    |
| O88507        | Ciliary neurotrophic factor receptor subunit alpha               | Cntfr        | 4               | 1.03           | 8.56E-01        |                    |
| <b>P13595</b> | <b>Neural cell adhesion molecule 1</b>                           | <b>Ncam1</b> | <b>24</b>       | <b>1.03</b>    | <b>8.81E-01</b> |                    |
| Q7M6Z0        | Reticulon-4 receptor-like 2                                      | Rtn4rl2      | 7               | 1.03           | 8.32E-01        |                    |
| O08842        | GDNF family receptor alpha-2                                     | Gfra2        | 9               | 1.06           | 7.82E-01        |                    |
| Q8BLC3        | Ly6/PLAUR domain-containing protein 1                            | Lypd1        | 2               | 1.07           | NaN             |                    |
| P01831        | Thy-1 membrane glycoprotein                                      | Thy1         | 5               | 1.08           | 7.07E-01        |                    |
| Q8CFV4        | Neuritin                                                         | Nrn1         | 3               | 1.08           | 5.83E-01        |                    |
| Q9QZF2        | Glypican-1;Secreted glypican-1                                   | Gpc1         | 14              | 1.09           | 6.39E-01        |                    |
| Q7TQ33        | RGM domain family member B                                       | Rgmb         | 4               | 1.09           | 7.18E-01        |                    |
| P12960        | Contactin-1                                                      | Cntn1        | 29              | 1.10           | 6.08E-01        |                    |
| <b>P29533</b> | <b>Vascular cell adhesion protein 1</b>                          | <b>Vcam1</b> | <b>13</b>       | <b>1.12</b>    | <b>5.22E-01</b> |                    |
| Q8BGN3        | Ectonucleotide pyrophosphatase/phosphodiesterase family member 6 | Enpp6        | 2               | 1.12           | 6.42E-01        |                    |
| Q8BLK3        | Limbic system-associated membrane protein                        | Lsamp        | 12              | 1.13           | 5.75E-01        |                    |
| P04925        | Major prion protein                                              | Prnp         | 8               | 1.13           | 5.92E-01        |                    |
| Q99PI8        | Reticulon-4 receptor                                             | Rtn4r        | 10              | 1.16           | 4.27E-01        |                    |
| Q8R4G0        | Netrin-G1                                                        | Ntng1        | 5               | 1.17           | 4.09E-01        |                    |
| Q9R0S3        | Matrix metalloproteinase-17                                      | Mmp17        | 8               | 1.17           | 2.46E-01        |                    |
| Q99PJ0        | Neurotrimin                                                      | Ntm          | 8               | 1.19           | 4.28E-01        |                    |
| Q8CAL5        | Glypican-5;Secreted glypican-5                                   | Gpc5         | 5               | 1.19           | 2.87E-01        |                    |
| P0CW02        | Lymphocyte antigen 6C1                                           | Ly6c1        | 2               | 1.21           | 3.73E-01        |                    |
| <b>O35136</b> | <b>Neural cell adhesion molecule 2</b>                           | <b>Ncam2</b> | <b>5</b>        | <b>1.21</b>    | <b>3.95E-01</b> |                    |

| UniProt AC | Protein names                    | Gene names | Unique peptides | Ratio (DKO/WT) | p-value  | Topology (UniProt) |
|------------|----------------------------------|------------|-----------------|----------------|----------|--------------------|
| Q8K0S5     | Reticulon-4 receptor-like 1      | Rtn4rl1    | 6               | 1.21           | 1.31E-01 |                    |
| Q9WTR5     | Cadherin-13                      | Cdh13      | 12              | 1.22           | 4.06E-01 |                    |
| Q8R422     | CD109 antigen                    | Cd109      | 5               | 1.23           | 4.33E-01 |                    |
| P21836     | Acetylcholinesterase             | Ache       | 12              | 1.26           | 3.42E-01 |                    |
| Q69Z26     | Contactin-4                      | Cntn4      | 8               | 1.28           | 2.33E-01 |                    |
| Q80Z24     | Neuronal growth regulator 1      | Negr1      | 10              | 1.32           | 2.34E-01 |                    |
| Q9JMB8     | Contactin-6                      | Cntn6      | 10              | 1.39           | 1.54E-01 |                    |
| O55186     | CD59A glycoprotein               | Cd59a      | 2               | 1.57           | 1.49E-02 |                    |
| P52793     | Ephrin-A1                        | Efna1      | 1               | NaN            | NaN      |                    |
| O08545     | Ephrin-A3                        | Efna3      | 1               | NaN            | NaN      |                    |
| Q01721     | Growth arrest-specific protein 1 | Gas1       | 1               | NaN            | NaN      |                    |
| P97785     | GDNF family receptor alpha-1     | Gfra1      | 1               | NaN            | NaN      |                    |
| Q9R087     | Glypican-6;Secreted glypican-6   | Gpc6       | 1               | NaN            | NaN      |                    |
| Q64253     | Lymphocyte antigen 6E            | Ly6e       | 1               | NaN            | NaN      |                    |
| Q8C4W3     | Neuritin-like protein            | Nrn1l      | 3               | NaN            | NaN      |                    |
| Q91X17     | Uromodulin                       | Umod       | 3               | NaN            | NaN      |                    |
